# Supplementary material for: Soybean Inoculated With One Bradyrhizobium Strain Isolated at Elevated [CO2] Show an Impaired C and N Metabolism When Grown at Ambient [CO2]
Source: Frontiers journal article supplement (doi:10.3389/fpls.2021.656961), 2021-05-20
Supplement: Data_Sheet_1.PDF [file Data_Sheet_1.PDF]

## *Supplementary Material*

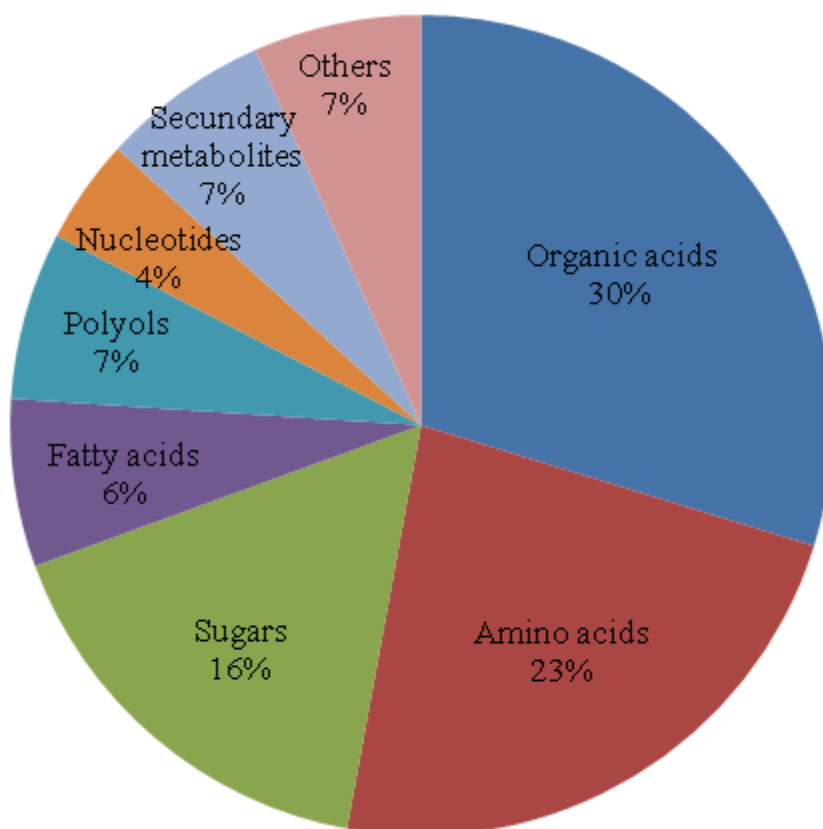

**Supplementary Figure 1.** . Classification of metabolites detected by GC-TOF/MS-based analysis in leaves and nodules of plants inoculated with USDA110, SFJ4-24 and SFJ14-36 *Bradyrhizobium japonicum* strains under ambient and elevated [CO<sub>2</sub>].
